# Supplementary material for: Doomed to drown? Sediment dynamics in the human-controlled floodplains of the active Bengal Delta
Source: Oxford University Press journal article supplement (doi:10.1525/elementa.250), 2017-01-01
Supplement: elementa-5-250-s1.pdf [file elementa-5-250-s1.pdf]

1 Supplemental Material  
2 Doomed to drown? Sediment dynamics in the human-controlled  
3 floodplains of the active Bengal Delta

Author names: Kimberly G. Rogers<sup>1\*</sup>, Irina Overeem<sup>1</sup>

<sup>1</sup>Institute of Arctic and Alpine Research, University of Colorado, Boulder, Colorado USA

4 \*kgrogers@colorado.edu

5

6 Model theory

7 AquaTellUs determines a preferential flowpath through a digital elevation model by calculating a  
8 steepest descent pathway, and thus defines the boundary condition for a 2D longitudinal channel  
9 belt profile:

10

$$H(x, t) = f(x)$$

11

12 Subsequently, we define change in elevation,  $H$ , over time,  $t$ , as a direct function of the  
13 depositional flux.

14

$$\frac{\partial H_x}{\partial t_x} = \frac{\partial F_x}{\partial x} + T$$

15

16 Whereas the rate of elevation change due to tectonic movement,  $T$ , is an additional important  
17 control in any evolving landscape, it is ignored for the applications in this paper. Net depositional  
18 sediment flux,  $F$ , at any given longitudinal location along a channel belt depends on both the  
19 erosion within the river channel,  $F_{ero}$ , and the local depositional sediment flux,  $F_{sed}$ .

20

$$\frac{\partial F_x}{\partial x} = \frac{\partial F_{ero}}{\partial x} - \frac{\partial F_{sed}}{\partial x}$$

21

22 Erosion follows classic geomorphological landscape evolution approaches, and depends on  
23 sediment substrate erodibility,  $k_{ero}$ , and streampower,  $u$ , i.e., the product of water discharge  $Q$  and  
24 channel belt slope raised to a pre-defined power,  $S^m$ .

25

$$\frac{\partial F_{ero}}{\partial x} = k_{ero} S^m Q(x, t)$$

26

27 Substrate erodibility,  $k_{ero}$ , is kept constant within the respective domains, implying that under  
 28 flood event conditions all sediment grainsize classes are rapidly eroded. The coefficient  $m$  is set  
 29 to equal 1 within the fluvial domain, effectively making erosion linearly dependent on  
 30 longitudinal slope. Upon entering the receiving marine basin  $m$  is set to 0, which implicitly causes  
 31 erosion to be slope-independent in the nearshore and shallow marine domain.

32 We conceptualize local sedimentation,  $F_{sed}$ , as a first-order kinetic reaction, which dictates that  
 33 sedimentation is proportional to the sediment load of the water,  $F$ . At any given location, the  
 34 sediment load in the water is the sum of eroded sediment,  $F_{ero}$  and the incoming riverine sediment  
 35 load,  $F_{in}$ . Sediment bypass,  $F_{out}$ , is the bedload and suspended sediment remaining in transport,  
 36 which travels further downstream.

37

$$F = F_{in} + F_{ero} = F_{sed} + F_{out}$$

38

39 We assume that deposition varies with grain size of the sediment load in transit.

40

$$\frac{\partial F_{sed}}{\partial x} = \frac{F(x, t)}{h_D}$$

41

42 The travel distance,  $h_D$ , is set to be dependent on grain size  $D$ , where coarse sediments have a  
 43 limited travel distance, and fine sediment can travel far along the transport pathway. Distinctly  
 44 different depositional regimes, as reflected in the associated travel distances, are defined for  
 45 fluvial and marine domains (Table S2).

46

47 Travel distances for six grainsize classes initially were calibrated from field observations  
 48 (Overeem et al., 2003) and subsequently re-calibrated against experiments with the physics-based  
 49 Delft3D model (Hoogendoorn et al., 2008). These travel distances are used in a generic way  
 50 across any river and delta system, since they reflect the inverse probability of deposition with  
 51 distance and are thus controlled to the first-order by grainsize of the sediment being transported.

52

53 The net sediment flux as determined along the longitudinal profile is subsequently deposited unto  
 54 the floodplain with lateral distance with respect to the channel belt, wherein lateral distance is  
 55 determined by flood magnitude and sediment grainsize in suspension. Sedimentation is generally

56 described to be high directly in and adjacent to the channel belt, whereas deposition decreases  
57 with distance. Empirically, this pattern has been quantified as an exponential decrease with  
58 distance [Pizzuto, 1987]. However, spatial variability may be significant as observed from  
59 sediment traps (Middelkoop and Asselman, 1998). Thus, deposits of sequences of flood years  
60 with variable magnitude can alternatively be described as a Gaussian distribution as originally  
61 proposed by Paola [2000]:  
62

$$F(y) = \frac{1}{\sqrt{2\pi}\sigma} e^{-\frac{(y-\mu)^2}{2\sigma^2}}$$

63  
64 Wherein  $y$  is the distance normal to the flowpath,  $\sigma$  is the standard deviation across the  
65 sedimentation zone and  $\mu$  is set at the channel belt axis. Relative sedimentation at any distance  
66 from the channel belt is then resolved by using an error function:  
67  
68

$$\text{erf}(y) = \frac{2}{\sqrt{\pi}} \int e^{-y^2} dy$$

69 In this formulation, relative total sedimentation is predicted by solving the error function, but we  
70 assume the coarsest sediments are deposited closest to the channel axis, whereas fine sediment  
71 travels further into the floodplain using the same concept of the travel distance in the lateral  
72 domain. Travel distances (for the fluvial domain) are listed in Table S2.  
73

74 Channel switching occurs when entirely new channel belt pathways are determined stochastically,  
75 but driven by both allocyclic and autocyclic controls. We assume an initial trigger is required to  
76 generate an initial ‘levee breach’ in the apex region, these breaches are thought to be more likely  
77 to occur in high monsoonal river discharge years. Monsoonal average river discharge is varied  
78 interannually by using a stochastically sampled number from a uniform distribution within a  
79 prescribed range, the so-called climate factor. We then employ a stochastically controlled  
80 ‘switching factor’ that generates a threshold. This threshold factor needs to be exceeded by the  
81 particular flood magnitude of the given monsoonal season to trigger determination of a new  
82 channel pathway. However, the new pathway can possibly reoccupy the previous pathway, and  
83 that is not entirely unlikely because the tread of the channels has usually eroded into the  
84 floodplain. However, reoccupation is especially likely when sedimentation in the apex region has  
85 been limited and no superelevation of the channel belt has been generated, so there is no need to

86 find a new steepest descent pathway. In combination, the modeled channel belt location remains  
87 stable over many flood seasons, but its location will more likely switch in peak flood years and in  
88 high sediment regimes (Overeem et al., 2005; Chen et al., 2015).  
89

90 **Table S1. Variables used in AquaTellUs**

| <b>Symbol</b> | <b>Definition</b>                     | <b>Unit</b>               |
|---------------|---------------------------------------|---------------------------|
| $H$           | Elevation                             | M                         |
| $T$           | Time                                  | S                         |
| $X$           | Location along a longitudinal profile | M                         |
| $F$           | Sediment load in the water            | $\text{m}^2\text{s}^{-1}$ |
| $T$           | Rate of tectonic movement             | $\text{ms}^{-1}$          |
| $F_{ero}$     | Channel erosion flux                  | $\text{m}^2\text{s}^{-1}$ |
| $F_{sed}$     | Net depositional flux                 | $\text{m}^2\text{s}^{-1}$ |
| $F_{in}$      | Incoming sediment flux                | $\text{m}^2\text{s}^{-1}$ |
| $F_{out}$     | Bypassing sediment flux               | $\text{m}^2\text{s}^{-1}$ |
| $S$           | Slope                                 | $\text{m m}^{-1}$         |
| $M$           | Constant                              |                           |
| $Q$           | Peak flood discharge                  | $\text{m}^3\text{s}^{-1}$ |
| $k_{ero}$     | Erodibility                           |                           |
| $h$           | Travel distance                       | M                         |

91

92

93 **Table S2. Experimental Setup**

|                                                             |                    |                                |
|-------------------------------------------------------------|--------------------|--------------------------------|
| <b>General</b>                                              |                    |                                |
| Simulation Duration                                         | 50                 | Years                          |
| Time step                                                   | 1                  | Year                           |
| Number of grid rows                                         | 180                | -                              |
| Number of grid columns                                      | 120                | -                              |
| Gridcell dx                                                 | 500                | m                              |
| Gridcell dy                                                 | 500                | m                              |
| Initial height at upstream end of floodplain                | 7                  | m                              |
| Initial floodplain slope                                    | 0.05               | m                              |
| Initial marine slope                                        | 0.15               | m                              |
| Grainsize                                                   | 0.4, 0.06, 0.002   | mm                             |
| Fraction in each grainsize class                            | 0.3 ,0.2, 0.5      |                                |
| Grain density                                               | 1800, 1950, 2000   | kgm <sup>-3</sup>              |
| Travel distance in fluvial domain (Hf)                      | 8000, 24000, 65000 | m                              |
| Travel distance in marine domain (Hm)                       | 2000, 6500, 20500  | m                              |
| Erosion Proportionality Constant in Fluvial Domain          | 0.00002            | -                              |
| Erosion Proportionality Constant in Marine Domain           | 0.0000001          | -                              |
| Climate Factor for Interannual variation in River Discharge | 0.7-1.3            | -                              |
| <b>First-order Channels</b>                                 |                    |                                |
| River Discharge                                             | 1500               | m <sup>3</sup> s <sup>-1</sup> |
| Suspended Sediment Concentration                            | 8                  | kg m <sup>-3</sup>             |
|                                                             |                    |                                |
| <b>Second-order Channels</b>                                |                    |                                |
| River Discharge                                             | 500                | m <sup>3</sup> s <sup>-1</sup> |
| Suspended Sediment Concentration                            | 8                  | kg m <sup>-3</sup>             |

**Table S3. Beryllium-7 results and locations for recovered trap and surface samples.**

BD = Below Detection. No surface samples were taken at sites that were eroded or inaccessible.

| <b>Sample name</b> | <b>Lat/Long</b>                | <b>Be-7 (dpm/g)</b> | <b>std dev</b> |
|--------------------|--------------------------------|---------------------|----------------|
| 5.1.A              | 22°42'37.21"N<br>90°29'4.14"E  | 0.63                | 0.24           |
| 5.1.B              | 22°43'56.83"N<br>90°28'54.75"E | BD                  | BD             |
| 5.1.C              | 22°43'49.84"N<br>90°28'48.33"E | 1.88                | 0.74           |
| 5.1.D              | 22°43'22.25"N<br>90°29'6.37"E  | BD                  | BD             |
| 5.2.C              | 22°48'46.32"N<br>90°37'37.93"E | 1.64                | 0.87           |
| 5.2.D              | 22°48'48.02"N<br>90°37'44.88"E | BD                  | BD             |
| 5.3.B              | 22°49'50.04"N<br>90°29'58.35"E | 0.76                | 0.34           |
| 6.1.A              | 22° 0'4.01"N<br>90°37'25.65"E  | 1.36                | 0.57           |
| 6.1.D              | 22° 1'48.13"N<br>90°38'21.25"E | 2.64                | 0.79           |
| 6.2.B              | 22° 1'37.57"N<br>90°40'37.26"E | 0.63                | 0.76           |
| 6.2.C              | 22° 1'36.48"N<br>90°40'36.26"E | 1.01                | 2              |
| 6.2.D              | 22° 1'33.25"N<br>90°40'40.23"E | BD                  | BD             |
| 6.3.A              | 22° 5'20.89"N<br>90°41'30.10"E | 0.36                | 0.37           |
| 6.3.B              | 22° 5'22.09"N<br>90°41'29.90"E | 0.87                | 0.62           |
| 6.3.C              | 22°42'44.37"N<br>90°31'45.77"E | 0.46                | 0.43           |
| 7.1.A              | 22° 4'39.10"N                  | 0.27                | 0.62           |

|       |                                |      |      |
|-------|--------------------------------|------|------|
|       | 90° 5'33.60"E                  |      |      |
| 7.1.B | 22° 4'38.24"N<br>90° 5'38.61"E | 0.90 | 0.5  |
| 7.1.C | 22° 5'39.01"N<br>90° 5'28.50"E | 1.89 | 1.67 |
| 7.1.D | 22° 5'39.70"N<br>90° 5'30.13"E | 0.83 | 0.85 |
| 7.2.A | 21°59'3.60"N<br>90° 3'24.35"E  | BD   | BD   |
| 7.2.B | 21°59'2.85"N<br>90° 3'23.01"E  | 0.34 | 0.54 |
| 7.2.C | 21°59'1.84"N<br>90° 1'34.50"E  | 0.56 | 0.26 |
| 7.2.D | 21°59'8.78"N<br>90° 1'32.90"E  | 1.24 | 0.33 |
| 7.3.A | 21°59'7.92"N<br>90° 1'34.73"E  | 0.58 | 0.28 |
| 7.3.B | 22° 1'26.74"N<br>90° 2'30.38"E | 1.04 | 0.49 |
| 7.3.C | 22° 1'26.75"N<br>90° 2'29.13"E | 1.42 | 1.15 |
| 8.1.A | 22°28'38.72"N<br>89°59'55.80"E | 0.25 | 0.24 |
| 8.1.C | 22°28'37.12"N<br>89°59'54.36"E | 0.42 | 0.19 |
| 8.2.A | 22°29'3.31"N<br>89°59'26.47"E  | 0.40 | 0.49 |
| 8.3.B | 22°30'21.45"N<br>89°57'52.72"E | 0.19 | 0.16 |
| 8.3.D | 22°30'19.74"N<br>89°57'52.06"E | 0.40 | 0.25 |

95  
96  
97  
98  
99  
100



101  
102  
103  
104  
105  
106  
107  
108  
109  
110  
111  
112  
113

## References

- Hoogendoorn, RM, Overeem, I and Storms, JEA** 2008 Process-response modelling of fluvio-deltaic stratigraphy. *Comput Geosci* **34**(10): 1394–1416. DOI: <https://doi.org/10.1016/j.cageo.2008.02.006>
- Middelkoop, H and Asselman, NEM** 1998 Spatial variability of floodplain sedimentation at the event scale in the Rhine-Meuse Delta, the Netherlands. *Earth Surf Proc Land* **23**(6): 561–573. DOI: [https://doi.org/10.1002/\(SICI\)1096-9837\(199806\)23:6<561::AID-ESP870>3.0.CO;2-5](https://doi.org/10.1002/(SICI)1096-9837(199806)23:6<561::AID-ESP870>3.0.CO;2-5)
- Paola, C** 2000 Quantitative models of sedimentary basin. *Sedimentology* **47**(s1): 121–178. DOI: <https://doi.org/10.1046/j.1365-3091.2000.00006.x>
- Pizzuto, JE** 1987 Sediment diffusion during overbank flows. *Sedimentology* **34**: 301–317. DOI: <https://doi.org/10.1111/j.1365-3091.1987.tb00779.x>
